# Supplementary material for: Structure Determination Feasibility of Three-Dimensional Electron Diffraction in Case of Limited Data
Source: MDPI journal article supplement (doi:10.3390/sym14112355), 2022-11-08
Supplement: s1 [file s1]

Archive with 1 entries (1 files):
- symmetry-1980241-supplementary.pdf
